# Supplementary figures and images for: Neurological symptom burden impacts survival prognosis in patients with newly diagnosed non–small cell lung cancer brain metastases
Source: PubMed Central journal article supplement — Cancer. 2020 Jul 17;126(19):4341–52. doi: 10.1002/cncr.33085 (PMC7540353; doi:10.1002/cncr.33085), 2020-07-17

# SUPPLEMENTARY FIGURE 1

A

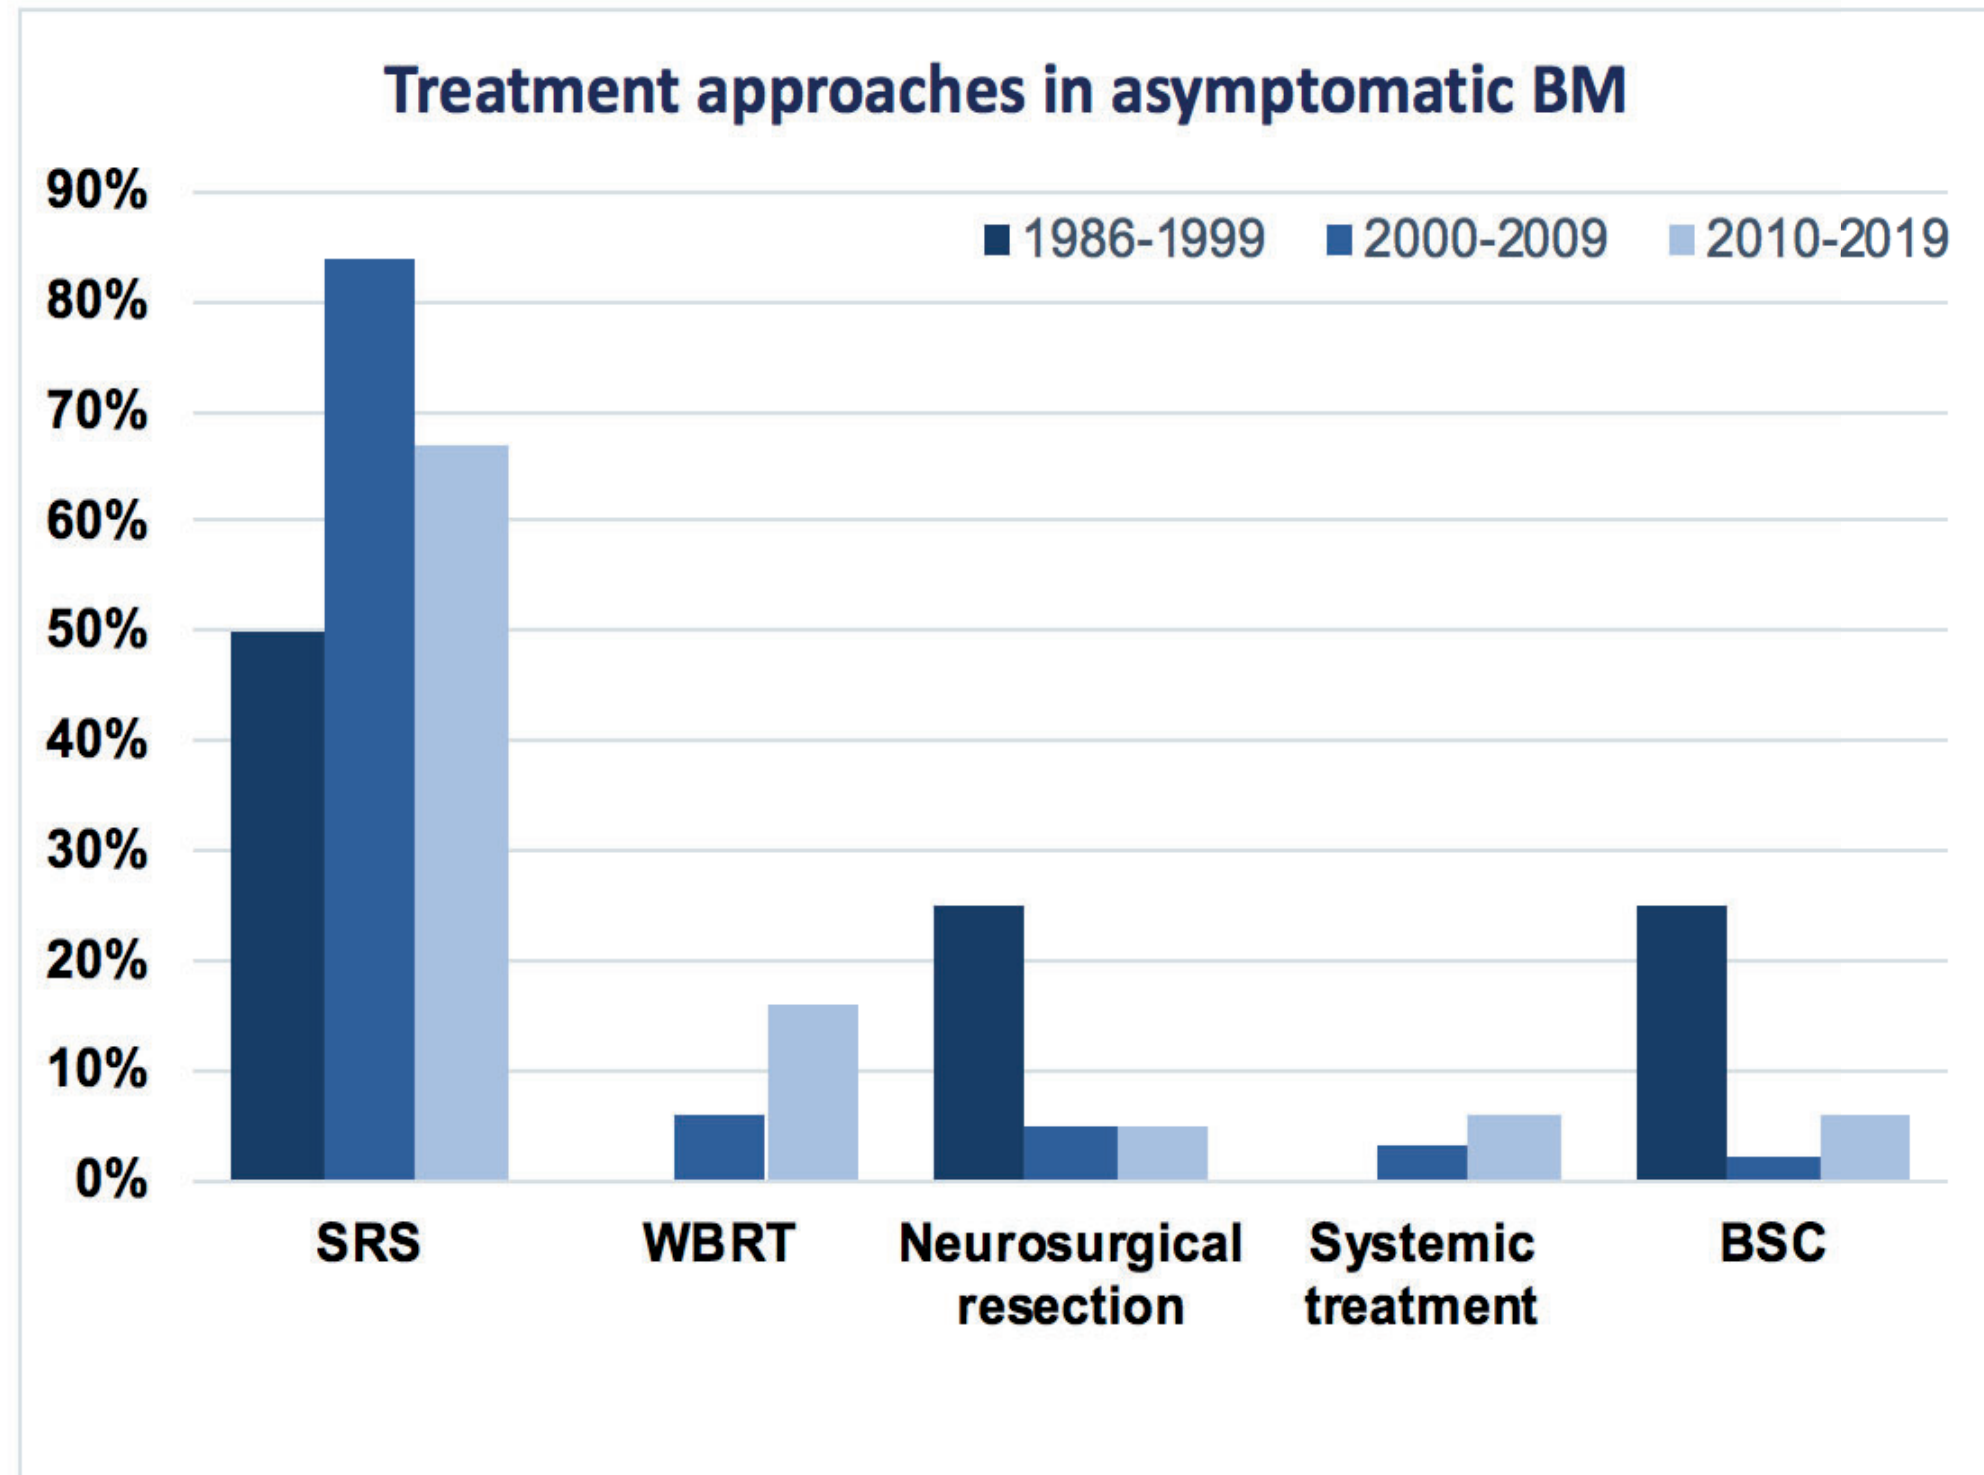

B

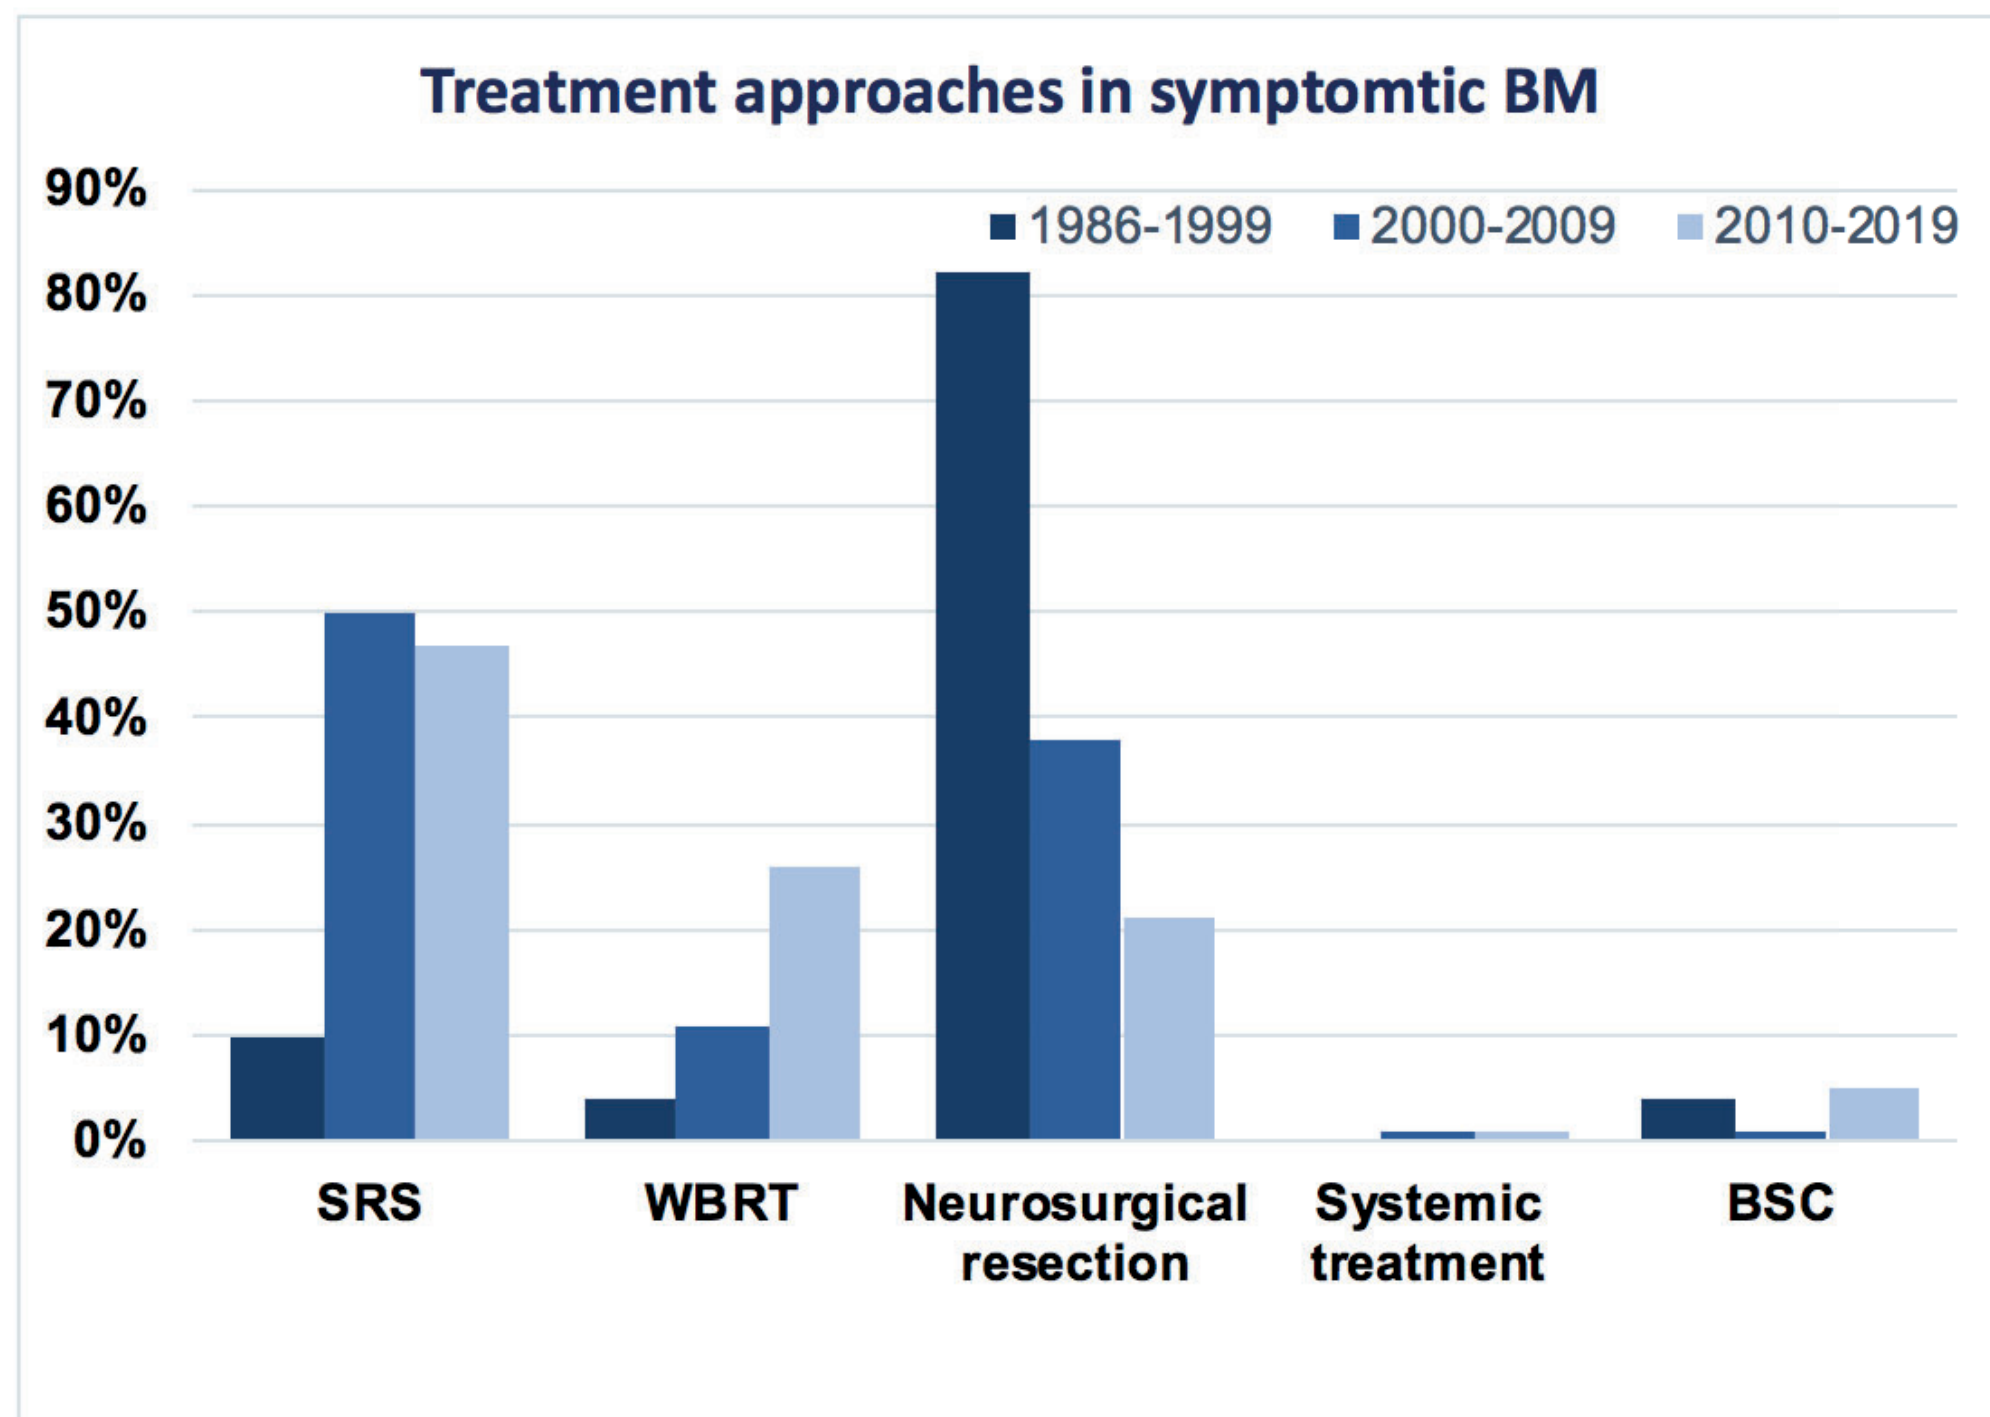

Supplement: CNCR-126-4341-s001.pdf [file CNCR-126-4341-s001.pdf]
